# Supplementary material
Source: PubMed Central journal article supplement (PMC6360133)
Supplement: NIHMS1507715-supplement-10456_2018_9648_MOESM2_ESM.pdf [file NIHMS1507715-supplement-10456_2018_9648_MOESM2_ESM.pdf]

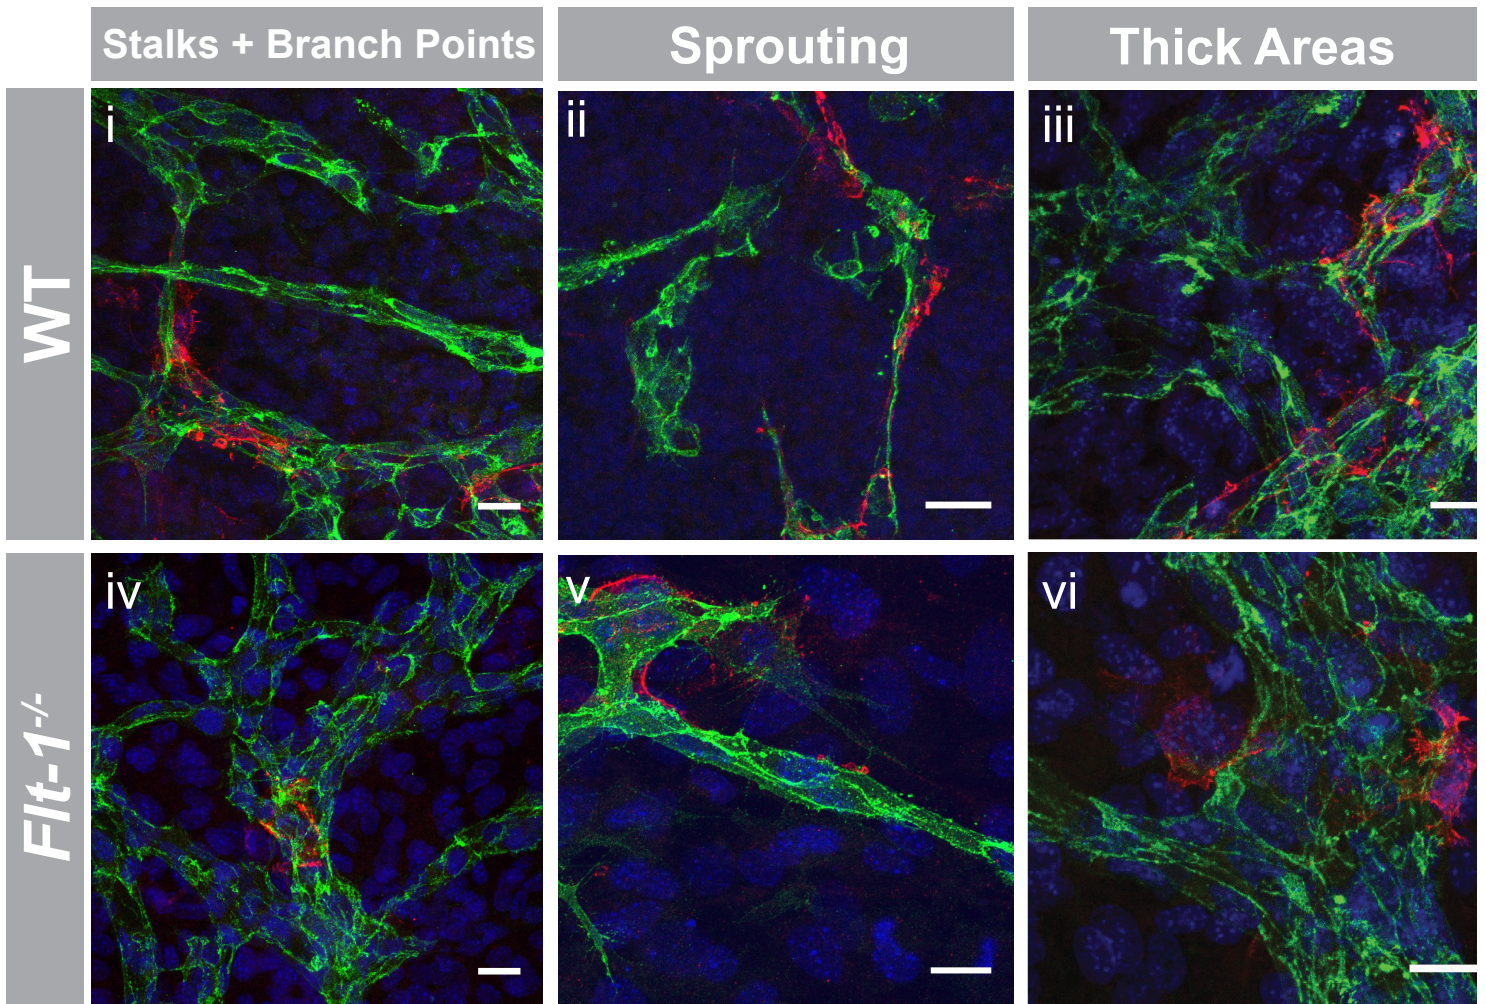

**Online Resource 2 -- Supplemental Figure 1.** Representative images of WT (i-iii) and *Flt1*<sup>-/-</sup> (iv-vi) Day 9 ESC-derived blood vessels labeled for endothelial cells (Pecam1: green), pericytes (Ng2, red), and cell nuclei (DAPI, blue). Distinct morphological locations (Stalks + Branch Points, Sprouting, and Thick Areas) were selected to provide a more comprehensive view of pericyte coverage within each region. Scale bars, 25  $\mu$ m.

Excess Vascular Endothelial Growth Factor-A Disrupts Pericyte Recruitment during Blood Vessel Formation. Angiogenesis. Jordan Darden, Laura Beth Payne, Huaning Zhao, John C. Chappell.

Corresponding Author: John C. Chappell, Center for Heart and Regenerative Medicine, Virginia Tech Carilion Research Institute, Roanoke, VA 24016, USA. E-mail: JChappell@vtc.vt.edu
