# Supplementary material
Source: PubMed Central journal article supplement (PMC6360133)
Supplement: NIHMS1507715-supplement-10456_2018_9648_MOESM3_ESM.pdf [file NIHMS1507715-supplement-10456_2018_9648_MOESM3_ESM.pdf]

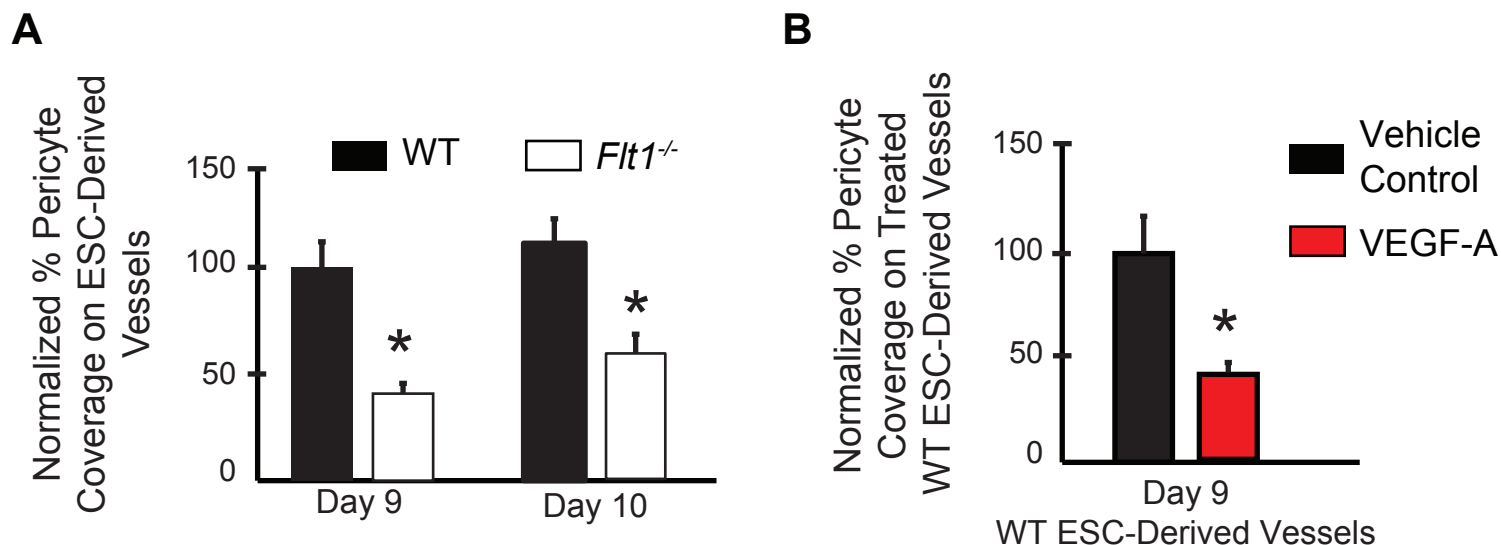

**Online Resource 3 -- Supplemental Figure 2.** Utilizing raw data presented in Figure 1B, we used the Day 9 WT group to find the normalized average percentages of Ng2<sup>+</sup> pericyte coverage on Days 9 (n=6 of biological replicates) and 10 (n=10 of biological replicates) ESC derived vessels for WT (black bars) and *Flt1*<sup>-/-</sup> (white bars) conditions. Values are averages + Standard Error of the Mean (SEM). \*P≤0.05 vs. WT at the same time point. (A) Normalized percentages of Ng2<sup>+</sup> pericyte coverage on Day 9 (n=3 biological replicates) WT ESC-derived vessels treated with vehicle control (black bar) and VEGF-A (red bar). Values are averages + Standard Error of the Mean (SEM). \*P≤0.05 vs. vehicle control group.

Excess Vascular Endothelial Growth Factor-A Disrupts Pericyte Recruitment during Blood Vessel Formation. *Angiogenesis*. Jordan Darden, Laura Beth Payne, Huaning Zhao, John C. Chappell.

Corresponding Author: John C. Chappell, Center for Heart and Regenerative Medicine, Virginia Tech Carilion Research Institute, Roanoke, VA 24016, USA. E-mail: JChappell@vtc.vt.edu
