# Supplementary material
Source: PubMed Central journal article supplement (PMC6360133)
Supplement: NIHMS1507715-supplement-10456_2018_9648_MOESM4_ESM.pdf [file NIHMS1507715-supplement-10456_2018_9648_MOESM4_ESM.pdf]

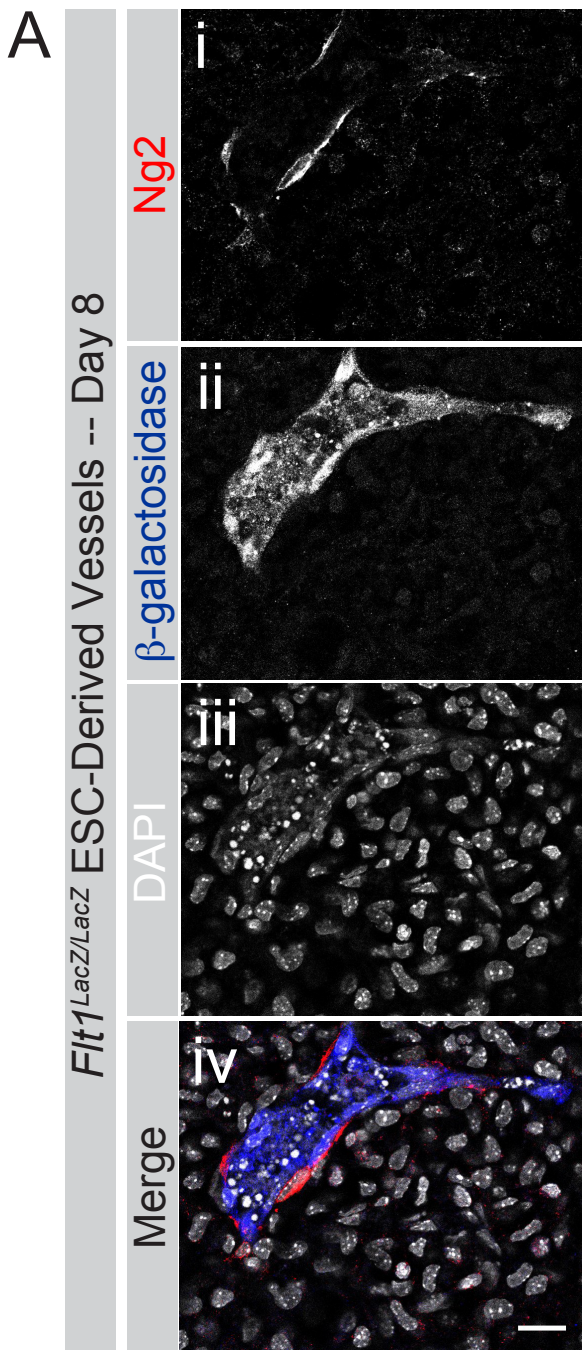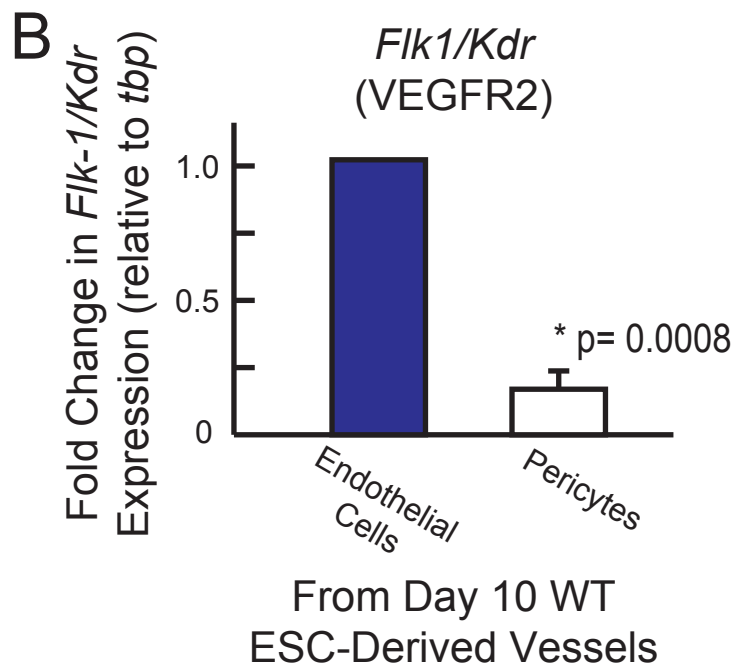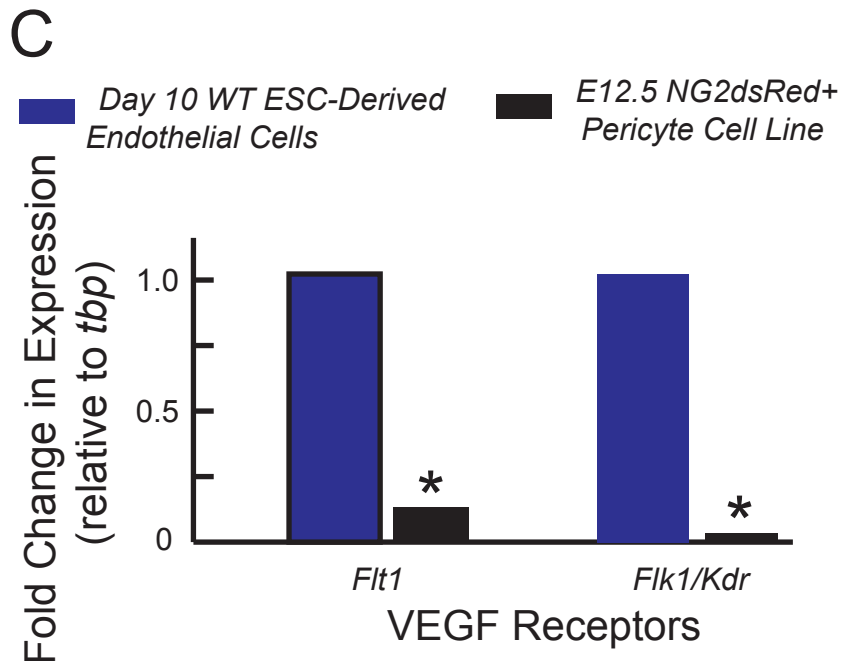

**Online Resource 4 -- Supplemental Figure 3.** Representative images of Ng2+ pericytes (Ng2: i, red in iv) and *Flt1* promoter activity as indicated by  $\beta$ -galactosidase ( $\beta$ -gal: ii, blue in iv) production from the *Flt-1:LacZ* gene. Cell nuclei are labeled by DAPI (iii, white in iv). Scale bar, 20  $\mu$ m (A). Fold change in *Flk1/Kdr/VEGFR2* expression between endothelial cells (blue bar) and pericytes (white bar) enriched from Day 10 WT ESC-derived vessels. Values are averages + SEM, n=4 biological replicates. \* $P\leq 0.05$ . (B) Fold change in *Flt1* and *Flk1/Kdr* expression between endothelial cells isolated from Day 10 WT ESC-Derived (blue bars) and our embryonic pericyte cell line (black bars). Values are averages + SEM, n=4 biological replicates. \* $P\leq 0.05$ . (C)

Excess Vascular Endothelial Growth Factor-A Disrupts Pericyte Recruitment during Blood Vessel Formation. Angiogenesis. Jordan Darden, Laura Beth Payne, Huaning Zhao, John C. Chappell.

Corresponding Author: John C. Chappell, Center for Heart and Regenerative Medicine, Virginia Tech Carilion Research Institute, Roanoke, VA 24016, USA. E-mail: JChappell@vtc.vt.edu
