# Supplementary material
Source: PubMed Central journal article supplement (PMC6360133)
Supplement: NIHMS1507715-supplement-10456_2018_9648_MOESM5_ESM.pdf [file NIHMS1507715-supplement-10456_2018_9648_MOESM5_ESM.pdf]

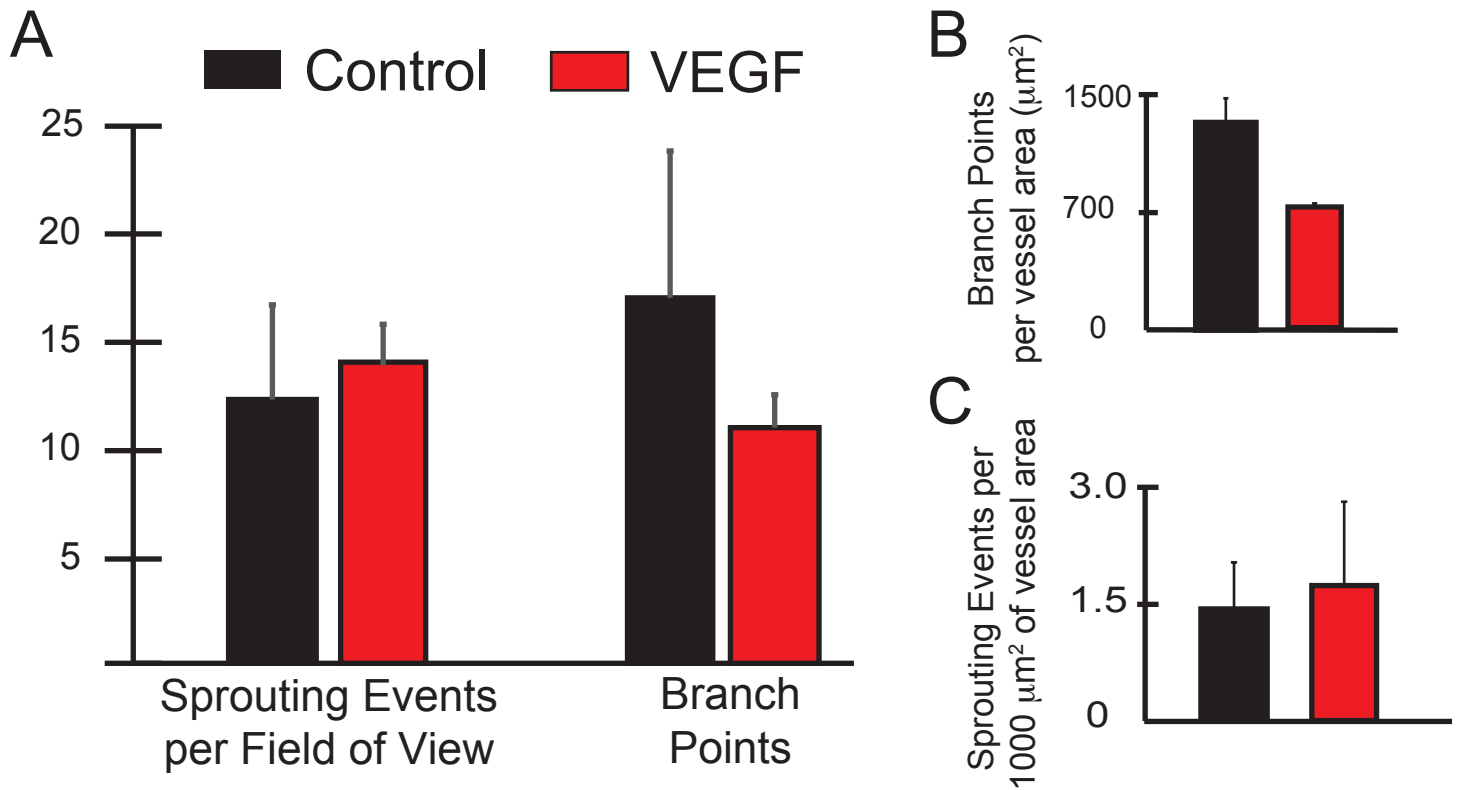

**Online Resource 5 -- Supplemental Figure 4.** Quantification of endothelial cell sprouting and vessel branching in E14.5 *ex vivo* remodeling embryonic skin vasculature during VEGF-A and control treatment. Values are averages + Standard Error of the Mean (SEM). No statistically significant differences were found (A). Branch point and sprouting event measurements from (A) normalized to vessel area. Values are averages + Standard Error of the Mean (SEM). No statistically significant differences were found (B).

Excess Vascular Endothelial Growth Factor-A Disrupts Pericyte Recruitment during Blood Vessel Formation. *Angiogenesis*. Jordan Darden, Laura Beth Payne, Huaning Zhao, John C. Chappell.

Corresponding Author: John C. Chappell, Center for Heart and Regenerative Medicine, Virginia Tech Carilion Research Institute, Roanoke, VA 24016, USA. E-mail: JChappell@vtc.vt.edu
