# Supplementary material
Source: PubMed Central journal article supplement (PMC6360133)
Supplement: NIHMS1507715-supplement-10456_2018_9648_MOESM6_ESM.pdf [file NIHMS1507715-supplement-10456_2018_9648_MOESM6_ESM.pdf]

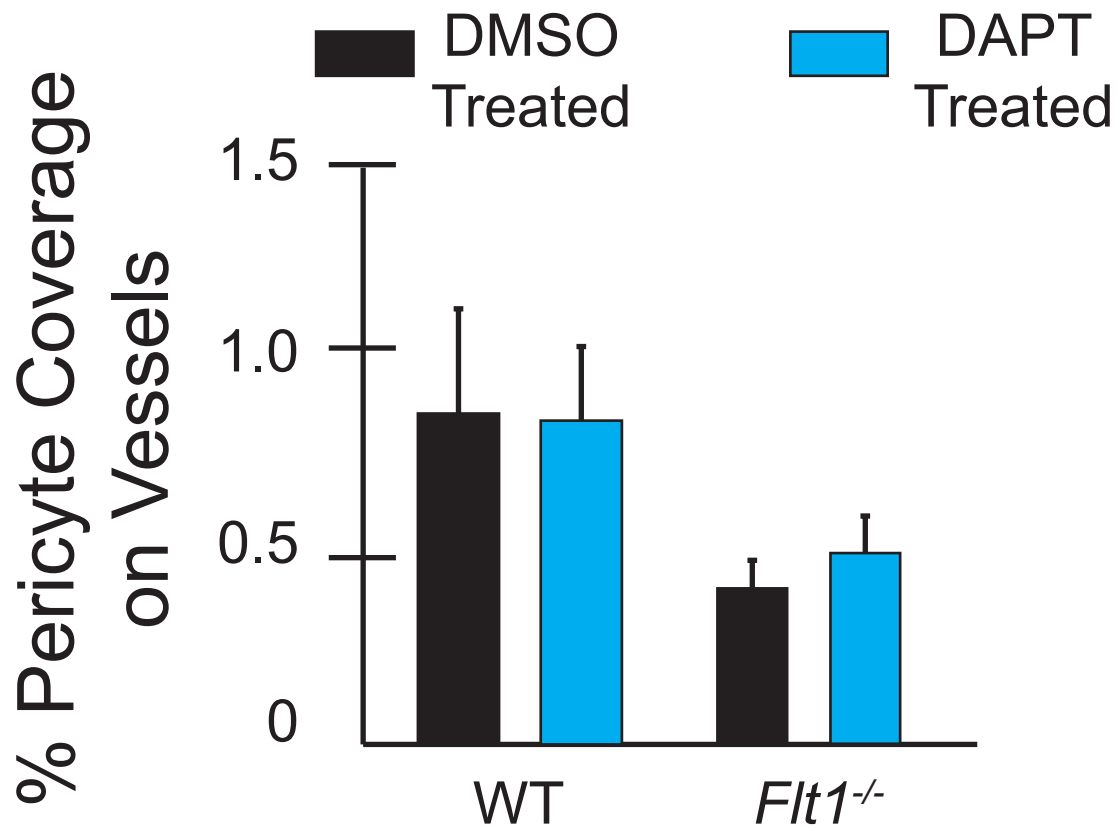

**Online Resource 6 -- Supplemental Figure 5.** Average percentages of Ng2+ pericyte coverage on Day 10 (n=3 of biological replicates) WT and *Flt1*<sup>-/-</sup> ESC derived vessels treated with DMSO vehicle control (black bars) or the Notch inhibitor DAPT (blue bars) conditions. Values are averages + Standard Error of the Mean (SEM). No statistically significant differences were found.

Excess Vascular Endothelial Growth Factor-A Disrupts Pericyte Recruitment during Blood Vessel Formation. *Angiogenesis*. Jordan Darden, Laura Beth Payne, Huaning Zhao, John C. Chappell.

Corresponding Author: John C. Chappell, Center for Heart and Regenerative Medicine, Virginia Tech Carilion Research Institute, Roanoke, VA 24016, USA. E-mail: JChappell@vtc.vt.edu
