# Supplementary material
Source: PubMed Central journal article supplement (PMC6360133)
Supplement: NIHMS1507715-supplement-10456_2018_9648_MOESM7_ESM.pdf [file NIHMS1507715-supplement-10456_2018_9648_MOESM7_ESM.pdf]

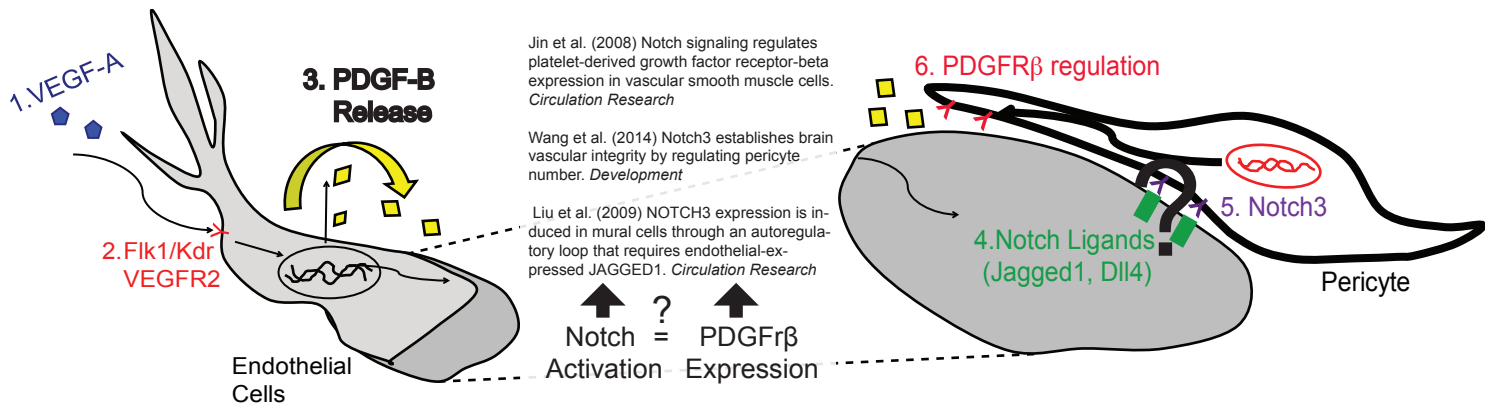

**Online Resource 7 -- Supplemental Figure 6.** Simplified schematic illustrating the working hypothesis from the current study. Briefly, during developmental blood vessel formation, VEGF-A predominantly signals through endothelial cells (through Fik1/Kdr/VEGFR2), such that loss of Flt-1 regulation of VEGF-A leads to aberrant endothelial cell signaling and excess PDGF-B release from numerous “tip” cells. Pericyte production of PDGFR $\beta$  decreases, which appears to be independent of Notch signaling between pericytes and adjacent endothelial cells. Thus, the observed decrease in pericyte coverage of *Flt1*<sup>-/-</sup> vessels likely occurs via *direct effects on endothelial cell signaling and indirect effects on pericyte signaling and behaviors.*

Excess Vascular Endothelial Growth Factor-A Disrupts Pericyte Recruitment during Blood Vessel Formation. *Angiogenesis*. Jordan Darden, Laura Beth Payne, Huaning Zhao, John C. Chappell.

Corresponding Author: John C. Chappell, Center for Heart and Regenerative Medicine, Virginia Tech Carilion Research Institute, Roanoke, VA 24016, USA. E-mail: JChappell@vtc.vt.edu
